# Supplementary material for: Correlation analysis between urinary crystals and upper urinary calculi
Source: PubMed Central journal article supplement — Asian J Urol. 2024 May 3;11(4):596–603. doi: 10.1016/j.ajur.2024.04.003 (PMC11551382; doi:10.1016/j.ajur.2024.04.003), 2024-05-03
Supplement: mmc1.pdf [file mmc1.pdf]

Supplementary Table 1. The distribution (*n*) of gender, age, stone location, and history of various urinary calculi (*n*=237).

| Stone composition                    | Gender |        | Age, year |     | Stone location |        |               | History |               | Total |
|--------------------------------------|--------|--------|-----------|-----|----------------|--------|---------------|---------|---------------|-------|
|                                      | Male   | Female | ≤52       | >52 | Ureter         | Kidney | Kidney+ureter | First   | Recrudescence |       |
| Calcium oxalate calculus             | 68     | 29     | 37        | 60  | 14             | 53     | 30            | 69      | 28            | 97    |
| Calcium oxalate+carbonate apatite    | 55     | 28     | 50        | 33  | 23             | 39     | 21            | 52      | 31            | 83    |
| Calcium oxalate+uric acid calculus   | 16     | 4      | 5         | 15  | 3              | 15     | 2             | 12      | 8             | 20    |
| Struvite+carbonate apatite           | 4      | 12     | 13        | 3   | 1              | 13     | 2             | 7       | 9             | 16    |
| Uric acid calculus                   | 9      | 6      | 2         | 13  | 2              | 10     | 3             | 13      | 2             | 15    |
| Struvite calculus                    | 2      | 0      | 0         | 2   | 0              | 1      | 1             | 2       | 0             | 2     |
| Carbonate apatite+hydroxyapatite     | 0      | 1      | 0         | 1   | 0              | 1      | 0             | 0       | 1             | 1     |
| Calcium oxalate+L-cystine calculus   | 1      | 0      | 1         | 0   | 0              | 0      | 1             | 1       | 0             | 1     |
| Carbonate apatite+L-cystine calculus | 0      | 1      | 1         | 0   | 0              | 1      | 0             | 0       | 1             | 1     |
| L-cystine calculus                   | 1      | 0      | 1         | 0   | 0              | 1      | 0             | 0       | 1             | 1     |
| Total                                | 156    | 81     | 110       | 127 | 43             | 134    | 60            | 156     | 81            | 237   |
